# Supplementary material for: Sex-dependent effects of genetic upregulation of activated protein C on delayed effects of acute radiation exposure in the mouse heart, small intestine, and skin
Source: PubMed Central journal article supplement (PMC8143413; doi:10.1371/journal.pone.0252142), 2021-05-24

# Male heart $\alpha$ -smooth muscle cell (SMC) actin

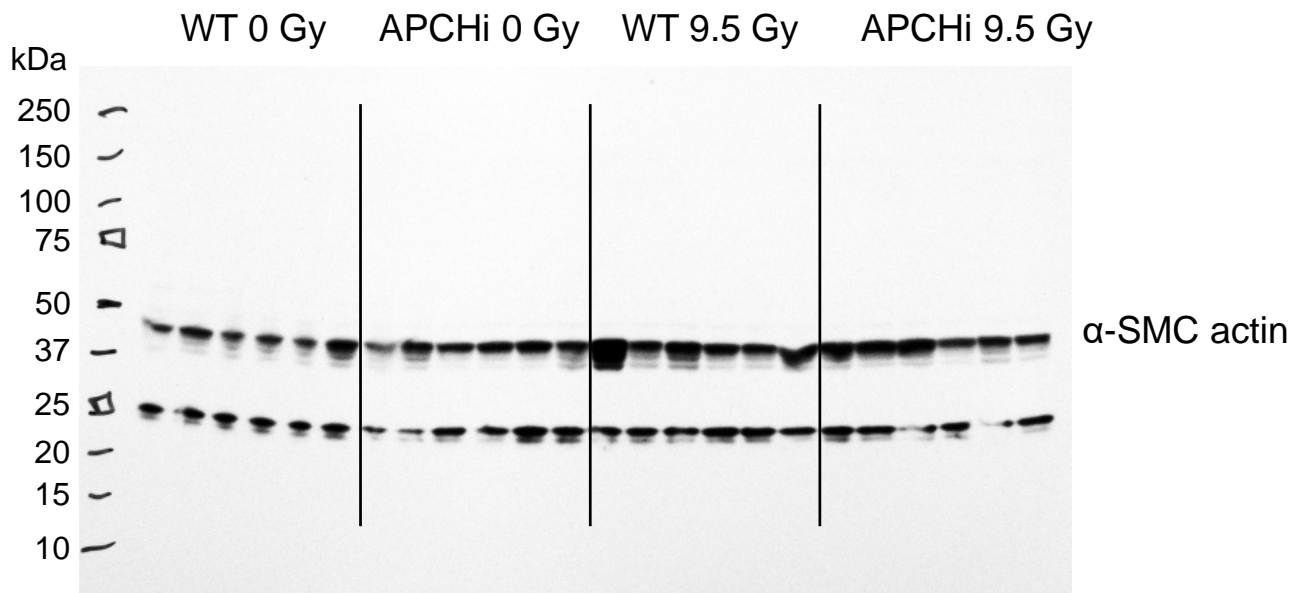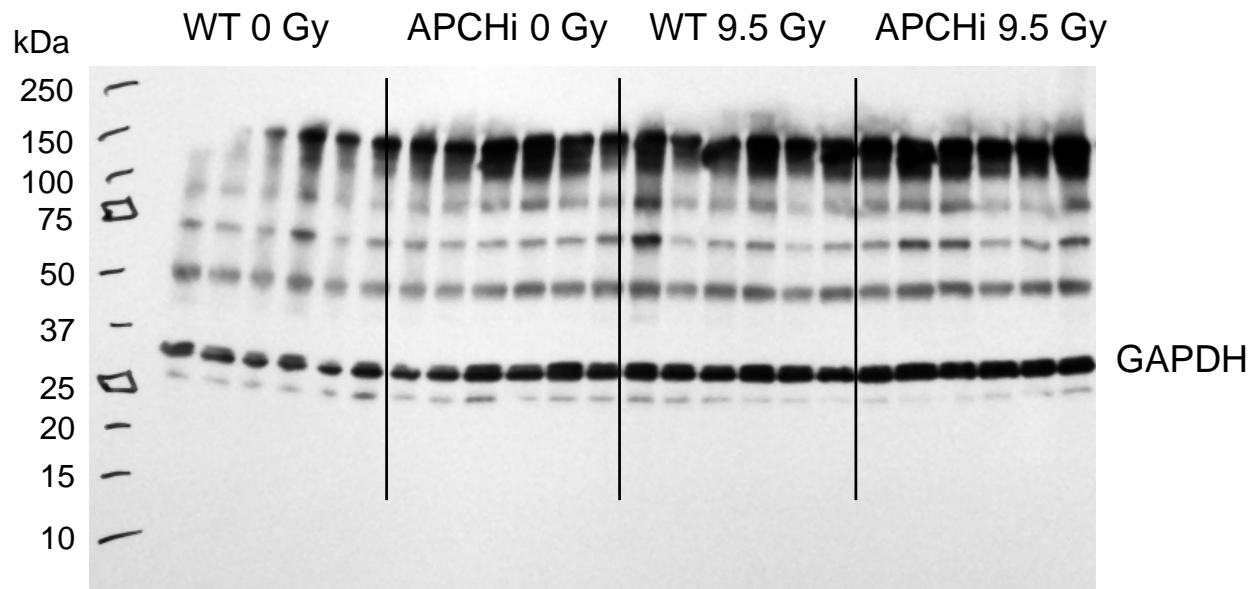

# Female heart $\alpha$ -smooth muscle cell (SMC) actin

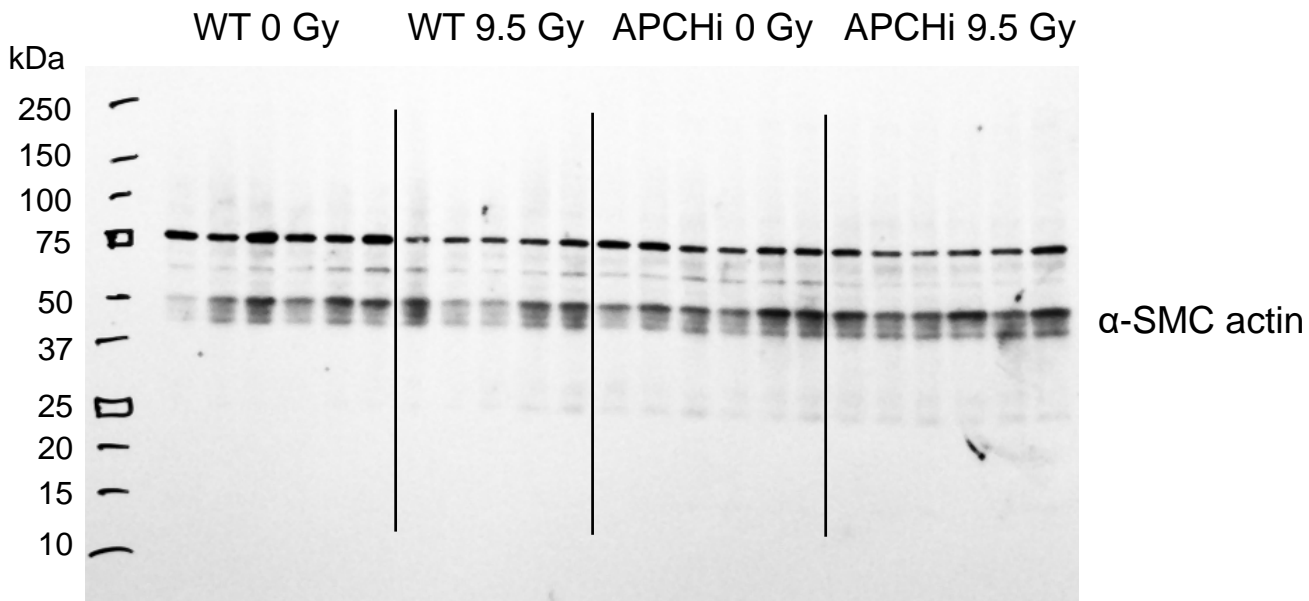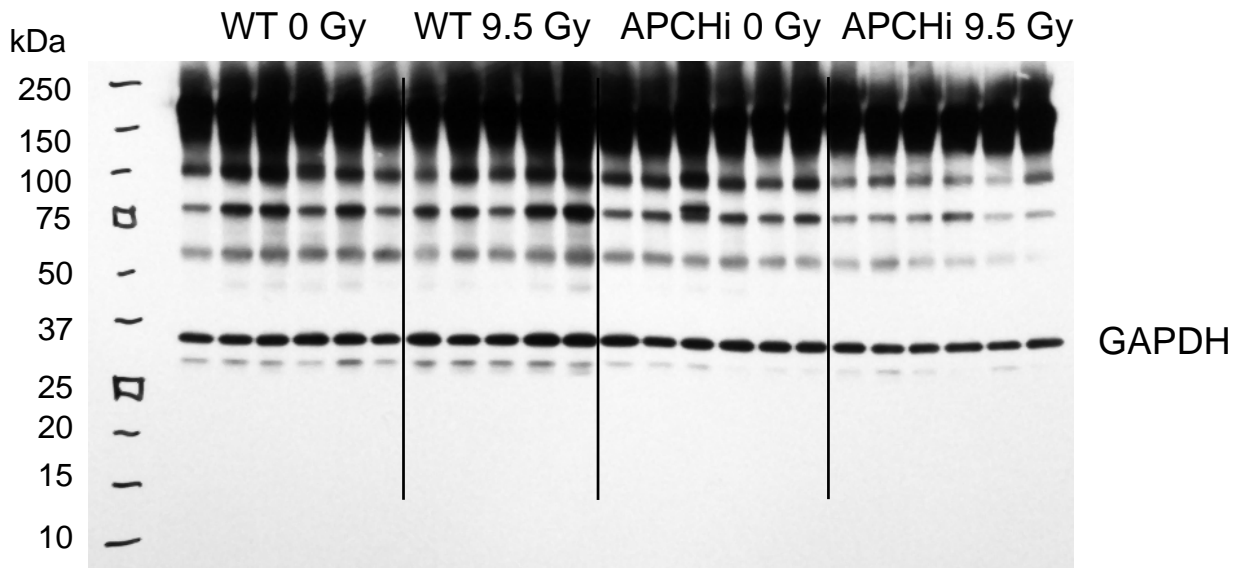

# Male intestine $\alpha$ -smooth muscle cell (SMC) actin

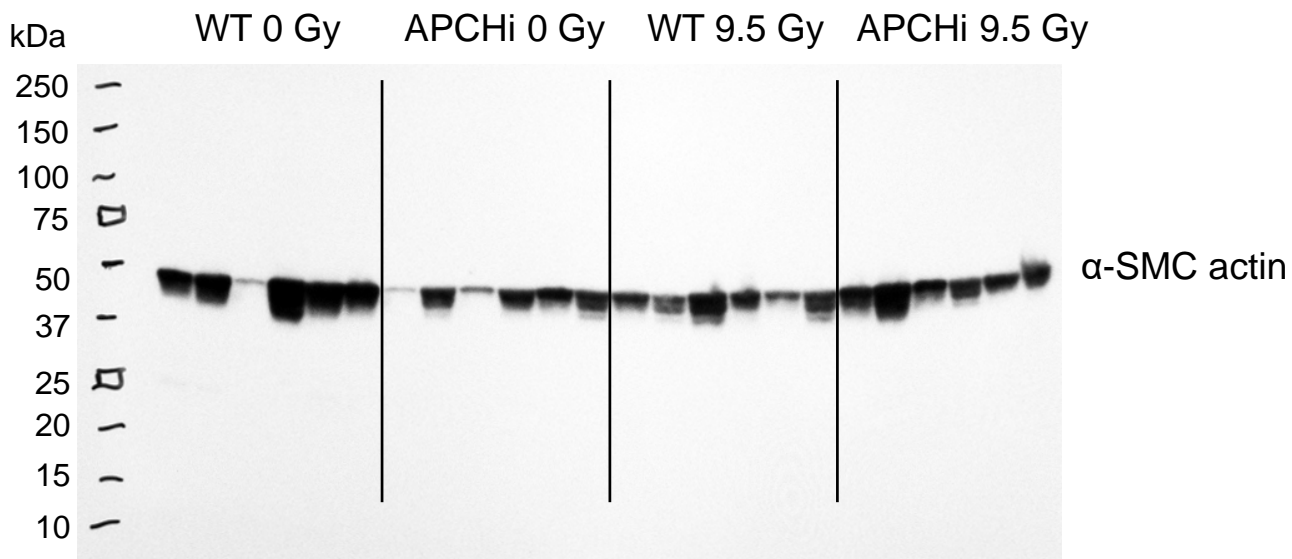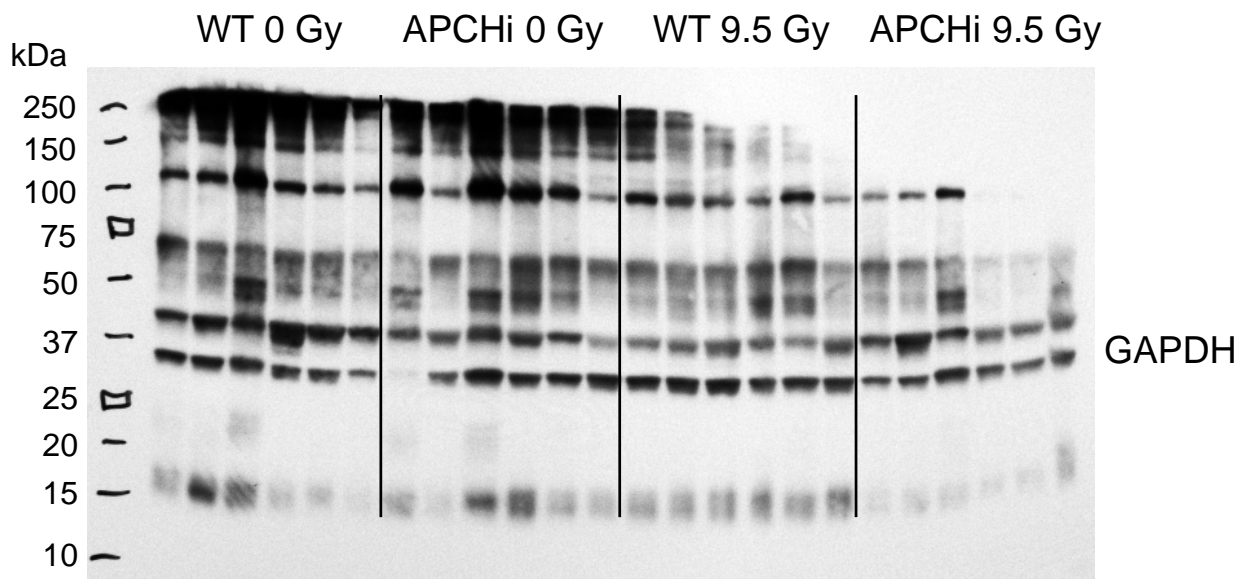

# Female intestine $\alpha$ -smooth muscle cell (SMC) actin

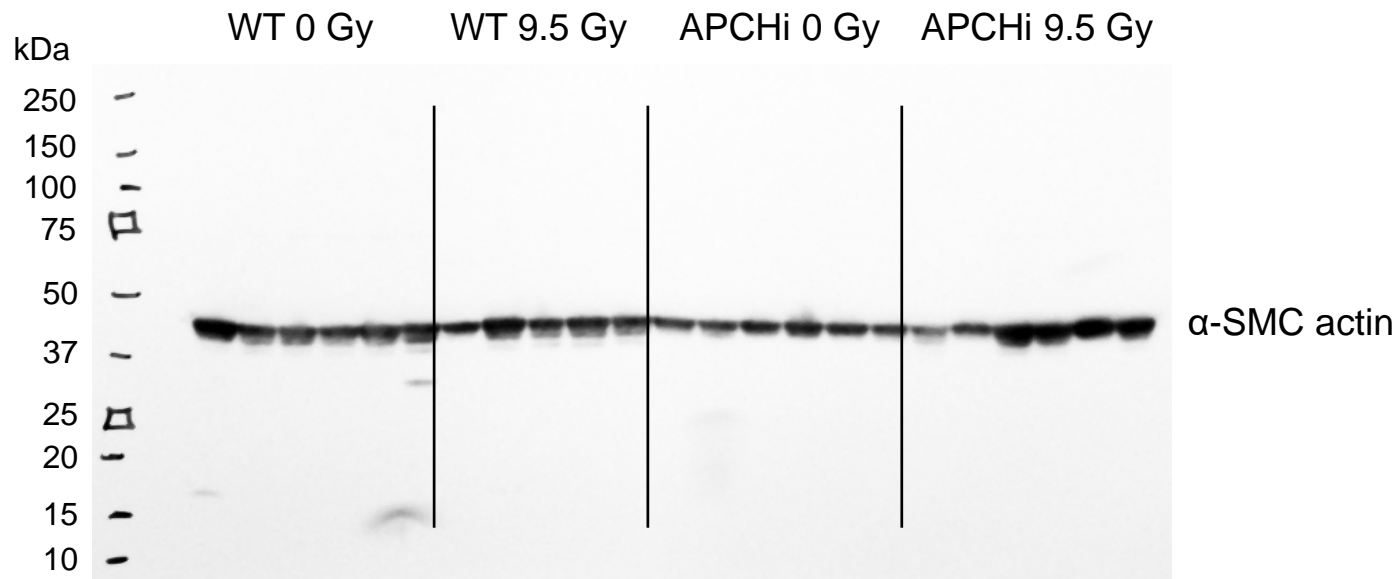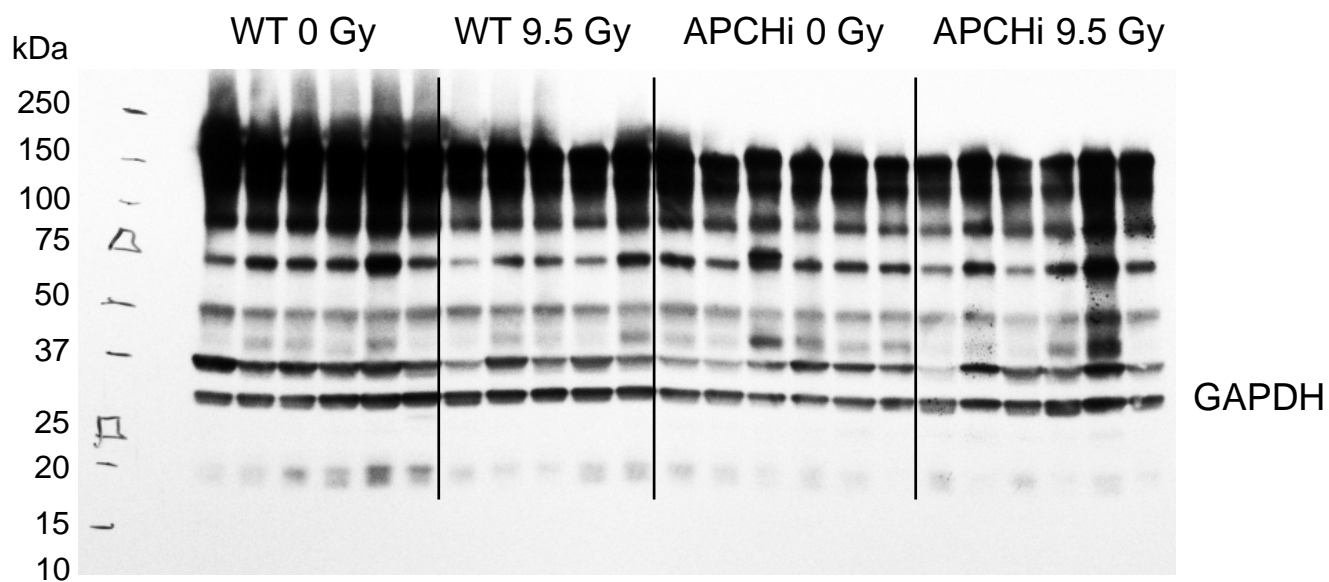

# Male intestine CD2

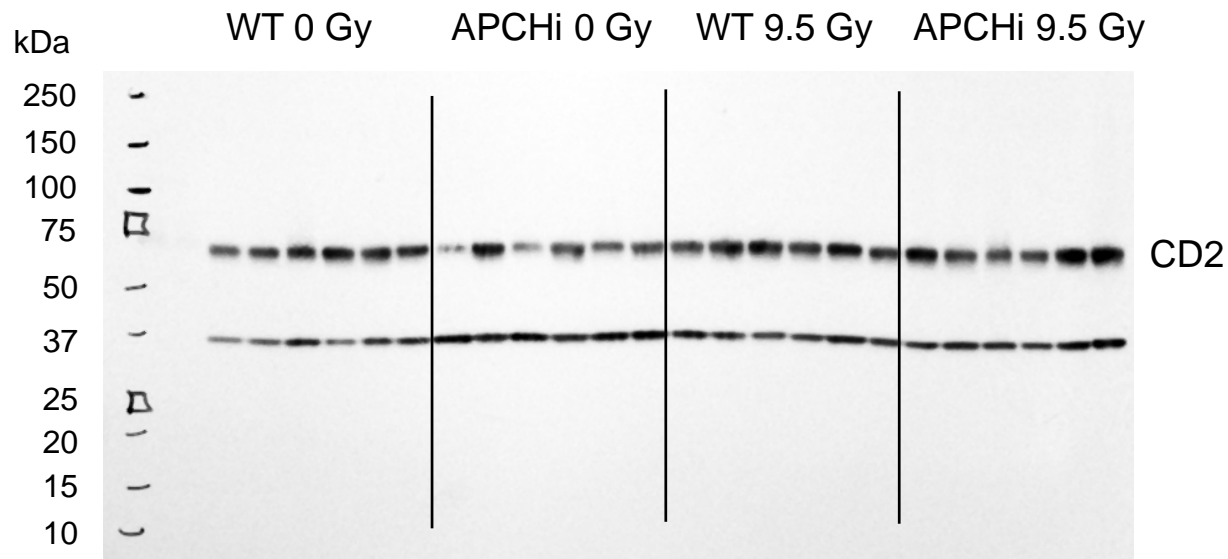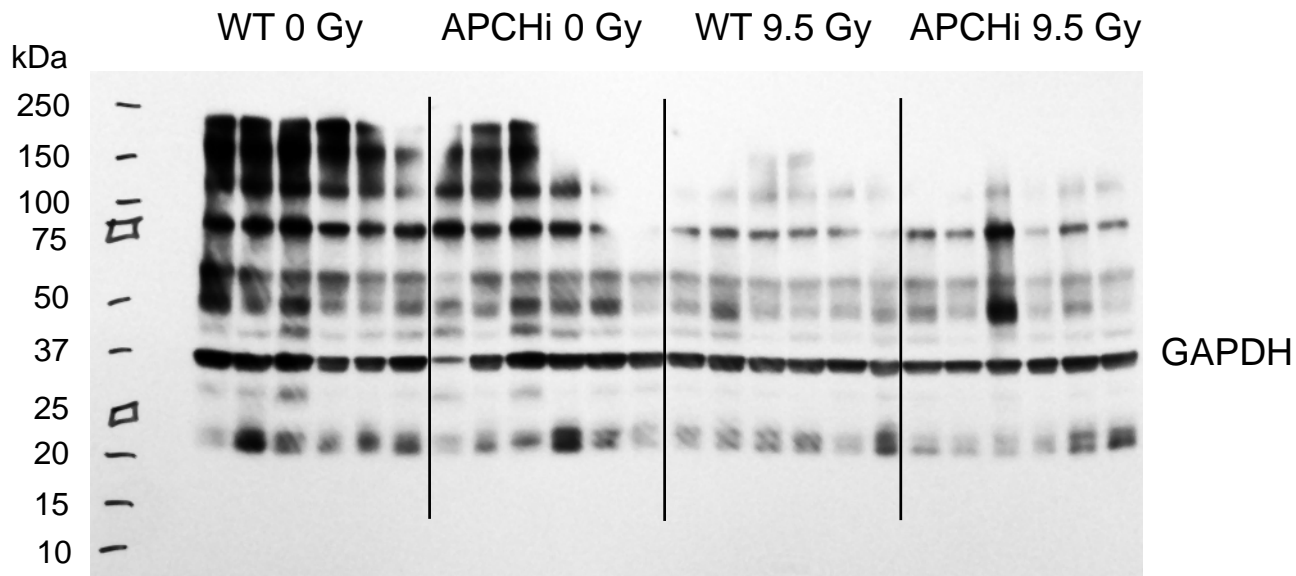

# Female intestine CD2

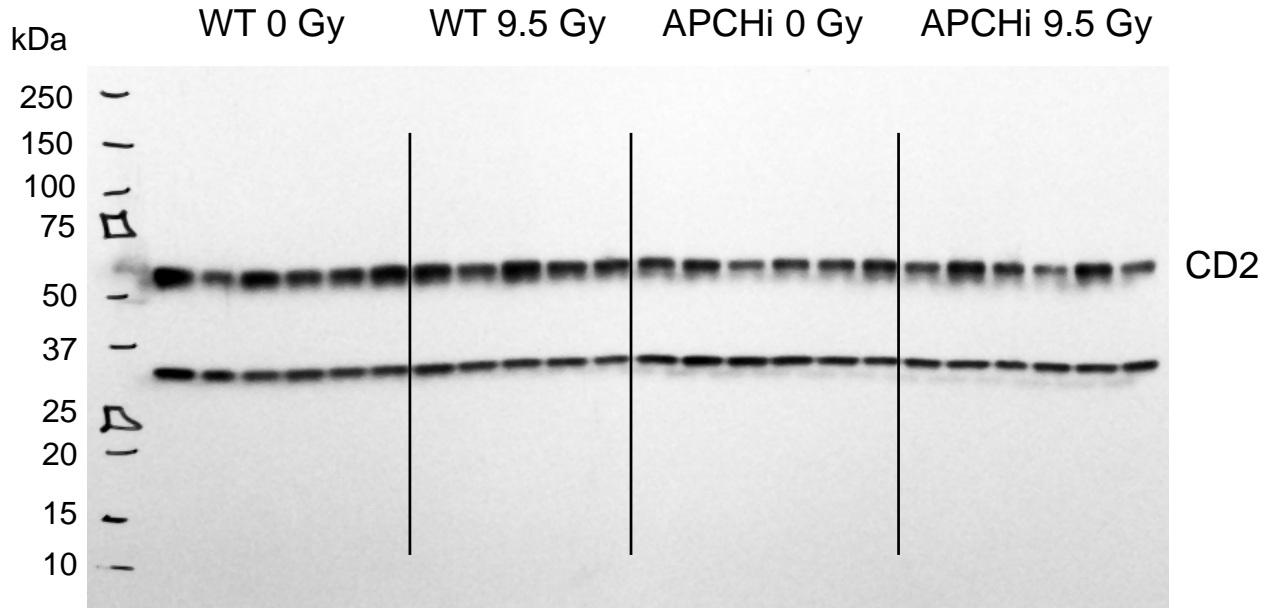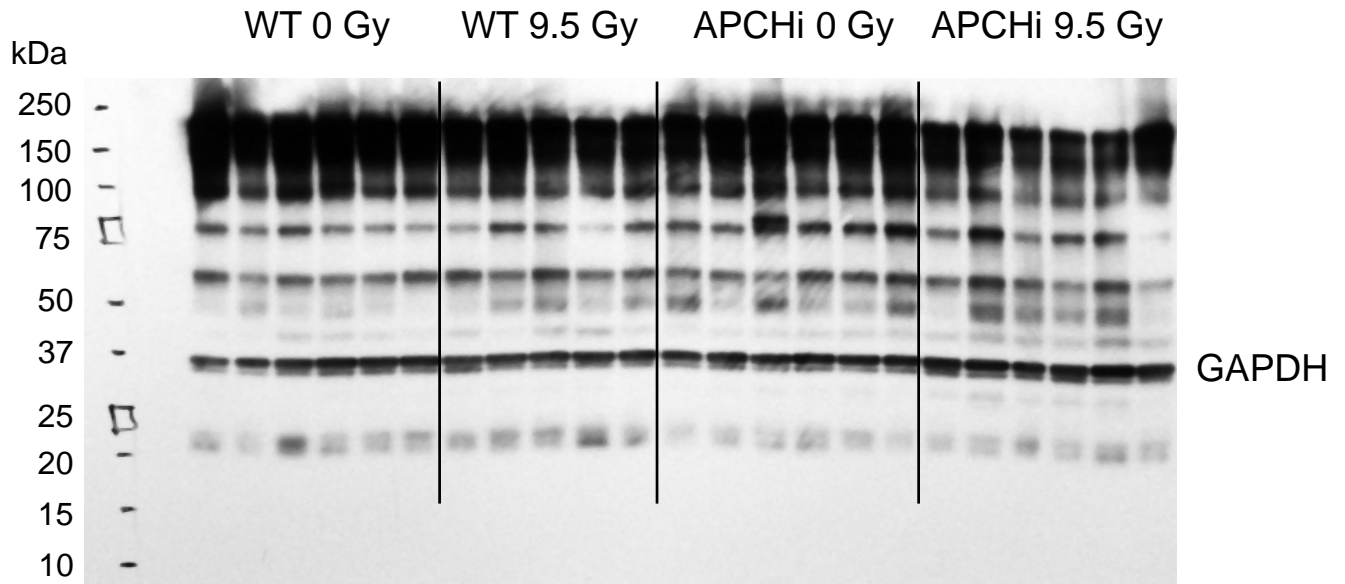

# Male heart toll-like receptor 4 (TLR4)-MD2 complex

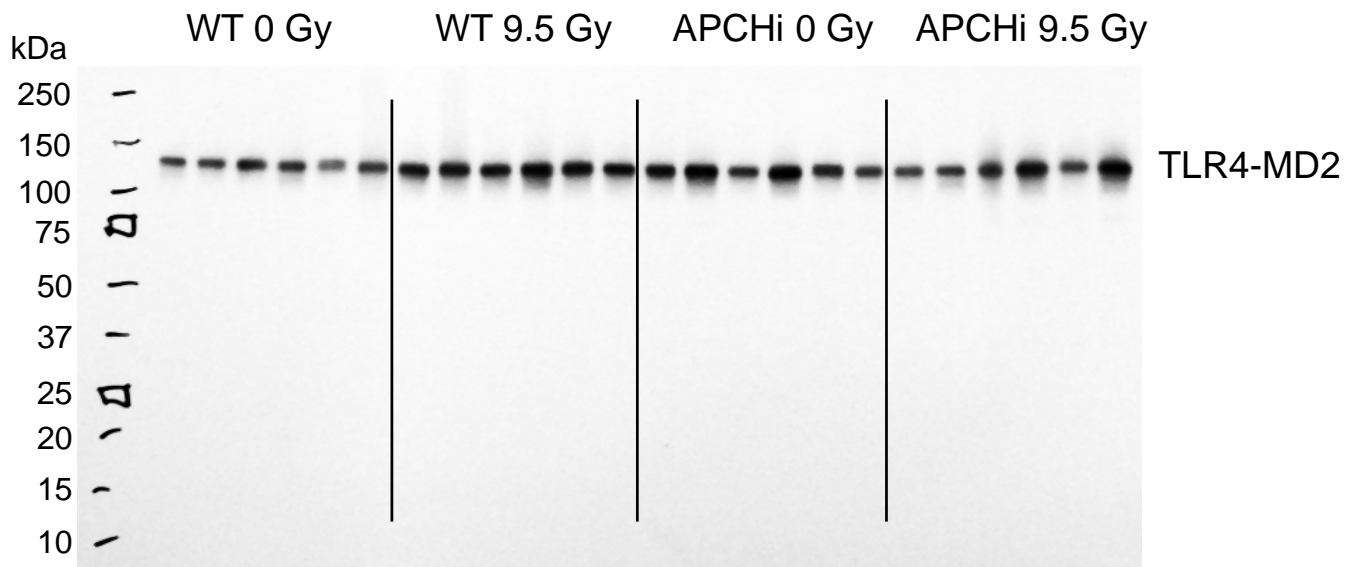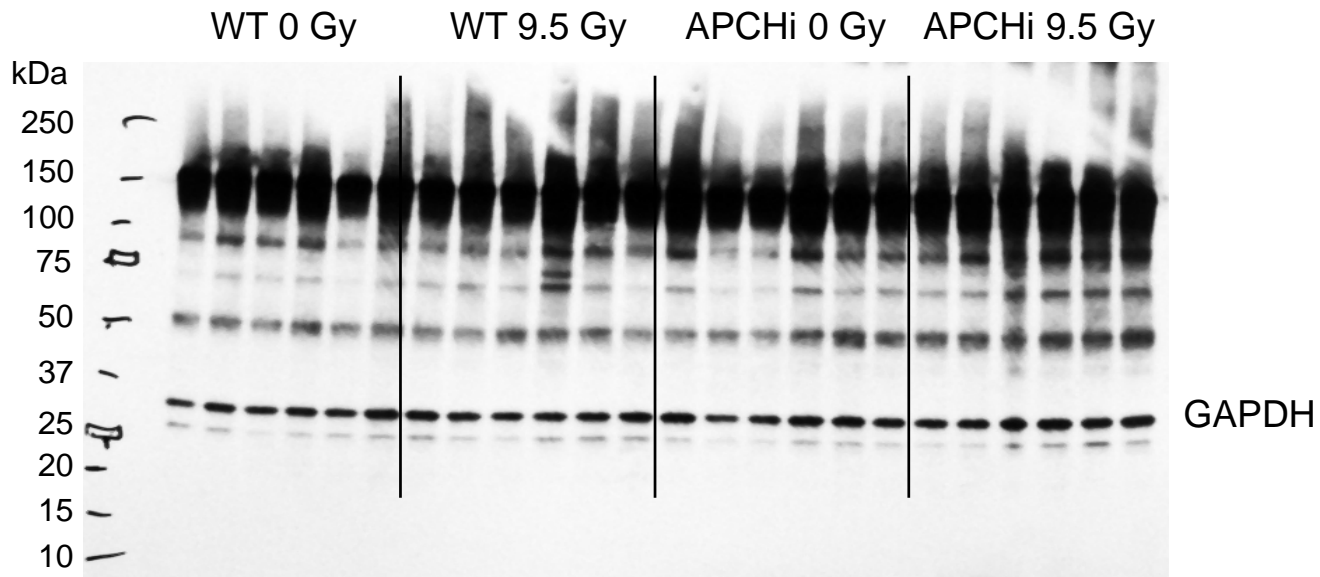

# Female heart toll-like receptor 4 (TLR4)-MD2 complex

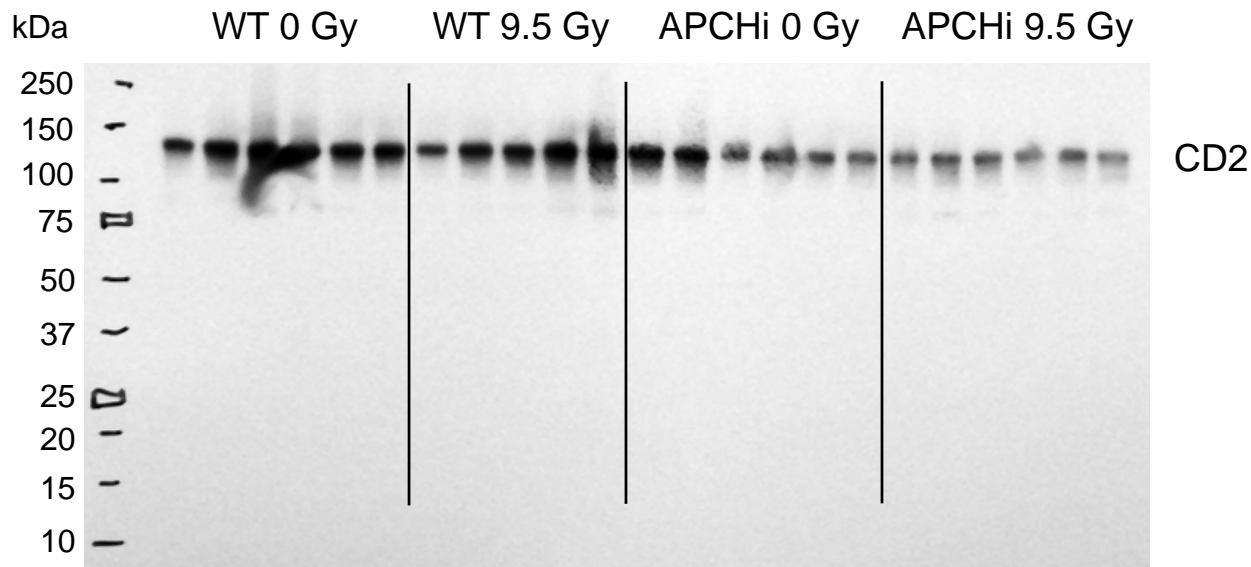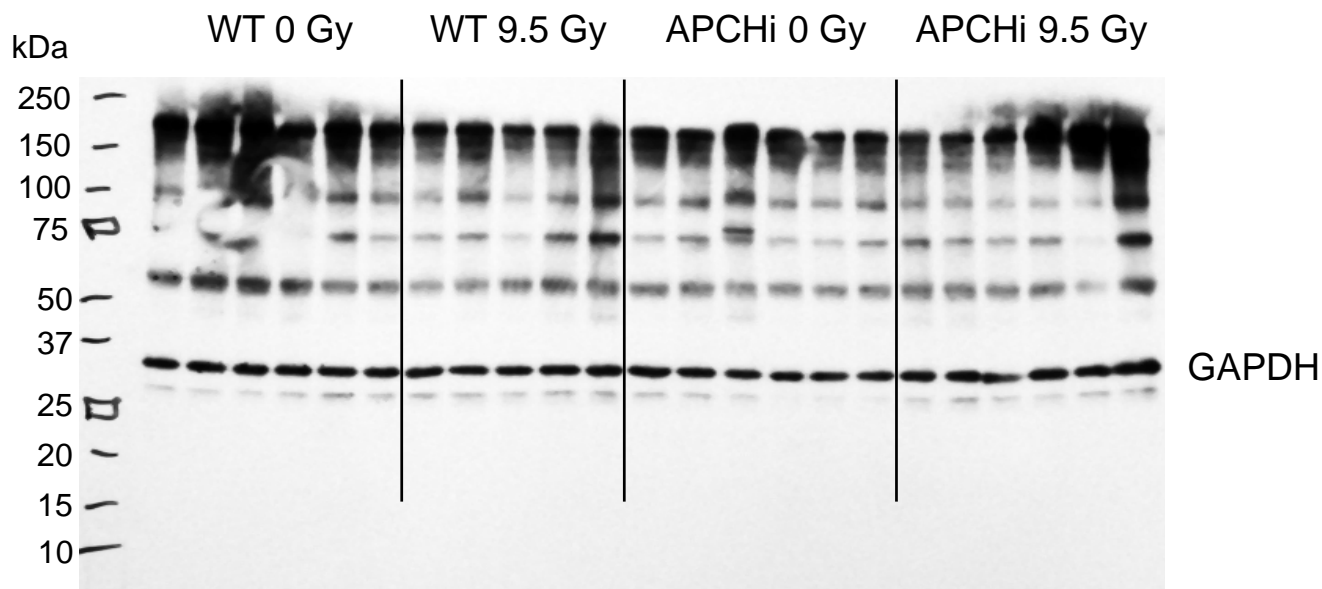

Supplement: pone.0252142.s020.pdf [file pone.0252142.s020.pdf]
