# Supplementary material for: Sex-dependent effects of genetic upregulation of activated protein C on delayed effects of acute radiation exposure in the mouse heart, small intestine, and skin
Source: PubMed Central journal article supplement (PMC8143413; doi:10.1371/journal.pone.0252142), 2021-05-24
Supplement: pone.0252142.s001.pdf [file pone.0252142.s001.pdf]

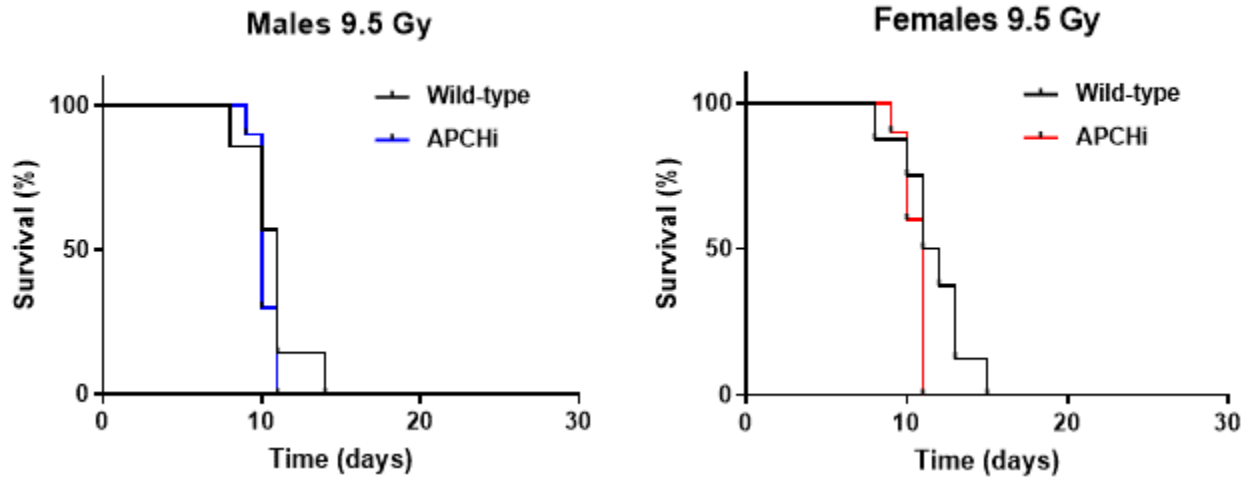

**S1 Fig. Thirty-day survival after 9.5 Gy total body irradiation.**  $n=7$  wild-type males, 10 APChi males, 8 wild-type females, and 10 APChi females. No differences were seen between the genotypes in both sexes.
