# Supplementary material for: Sex-dependent effects of genetic upregulation of activated protein C on delayed effects of acute radiation exposure in the mouse heart, small intestine, and skin
Source: PubMed Central journal article supplement (PMC8143413; doi:10.1371/journal.pone.0252142), 2021-05-24
Supplement: pone.0252142.s006.pdf [file pone.0252142.s006.pdf]

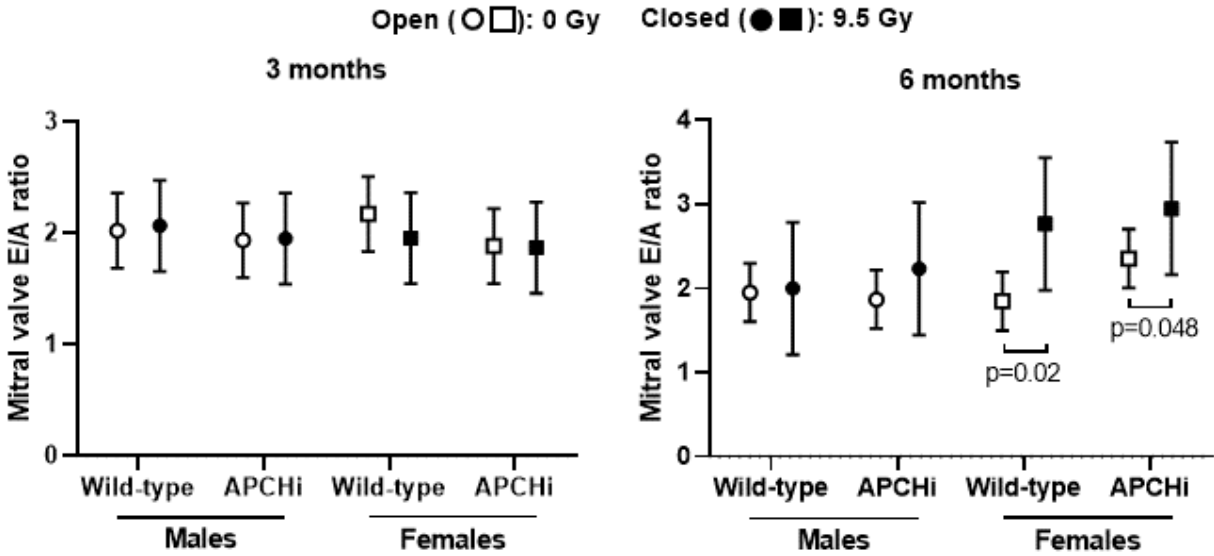

**S6 Fig. Ratio of mitral valve E to A velocities as measured with echocardiography at 3 and 6 months after irradiation.** Means and SD of the statistical model are shown;  $n=9$  wild-type males in 0 Gy, 12 wild-type males in 9.5 Gy, 8 APCHi males in 0 Gy, 10 APCHi males in 9.5 Gy, 8 wild-type females in 0 Gy, 8 wild-type females in 9.5 Gy, 10 APCHi females in 0 Gy, and 10 APCHi females in 9.5 Gy. Brackets indicate significant differences between 0 Gy and 9.5 Gy.
