# Supplementary material for: Sex-dependent effects of genetic upregulation of activated protein C on delayed effects of acute radiation exposure in the mouse heart, small intestine, and skin
Source: PubMed Central journal article supplement (PMC8143413; doi:10.1371/journal.pone.0252142), 2021-05-24
Supplement: pone.0252142.s009.pdf [file pone.0252142.s009.pdf]

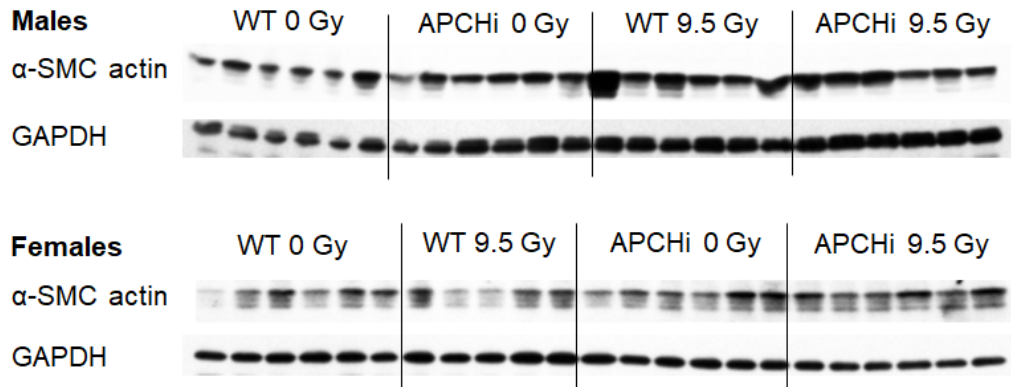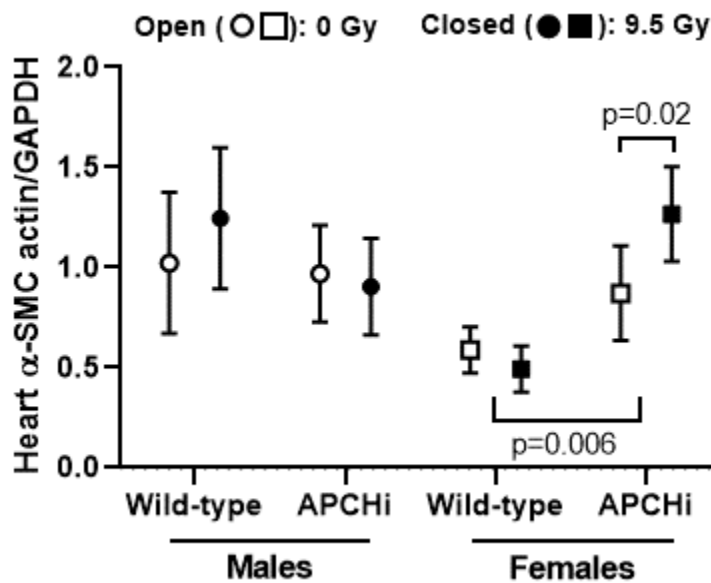

**S9 Fig. Expression of  $\alpha$ -smooth muscle cell ( $\alpha$ -SMC) actin in the heart at 6 months after irradiation.** Immunoblotting to determine left ventricular levels of  $\alpha$ -SMC actin corrected for the loading control GAPDH. Means and SD of the statistical model are shown;  $n=6$  mice per group. The short bracket indicates a significant difference between 0 Gy and 9.5 Gy. The wider bracket indicates that the effect of radiation in wild-type mice is significantly different from the effect of radiation in APChi mice.
