# Supplementary material for: Sex-dependent effects of genetic upregulation of activated protein C on delayed effects of acute radiation exposure in the mouse heart, small intestine, and skin
Source: PubMed Central journal article supplement (PMC8143413; doi:10.1371/journal.pone.0252142), 2021-05-24
Supplement: pone.0252142.s010.pdf [file pone.0252142.s010.pdf]

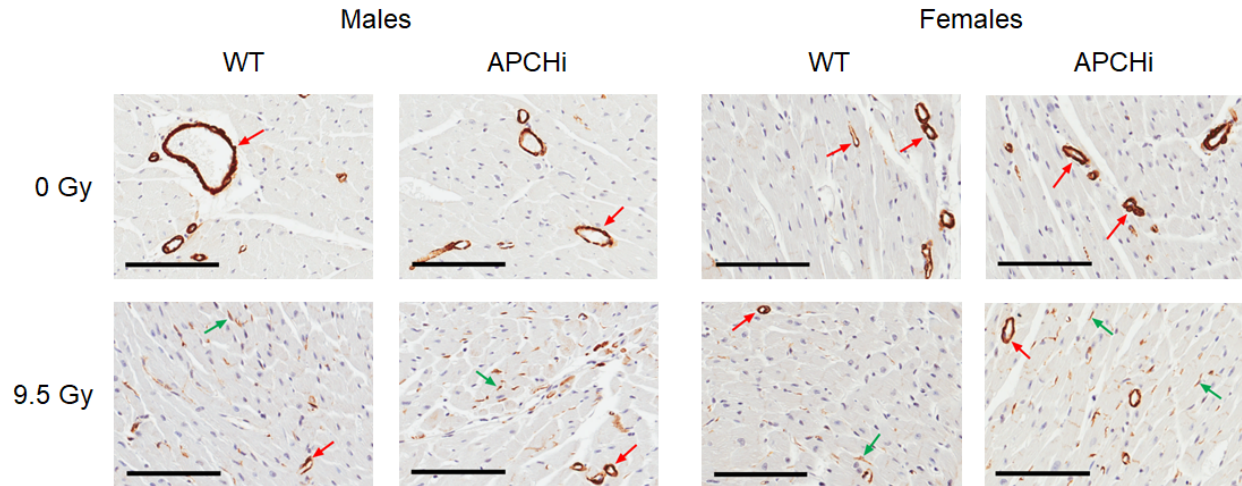

### Males

|                  |               |   |   |   |   |   |   |   |   |
|------------------|---------------|---|---|---|---|---|---|---|---|
| <b>Wild-type</b> | <b>0 Gy</b>   | 0 | 0 | 0 | 0 | 0 | 0 | 0 | 0 |
| <b>Wild-type</b> | <b>9.5 Gy</b> | 0 | 0 | 1 | 1 | 1 | 1 | 2 | 2 |
| <b>APChi</b>     | <b>0 Gy</b>   | 0 | 0 | 0 | 0 | 0 | 0 | 1 | 1 |
| <b>APChi</b>     | <b>9.5 Gy</b> | 1 | 1 | 2 | 2 | 3 | 4 | 4 |   |

### Females

|                  |               |   |   |   |   |   |   |   |   |
|------------------|---------------|---|---|---|---|---|---|---|---|
| <b>Wild-type</b> | <b>0 Gy</b>   | 0 | 0 | 0 | 0 | 1 | 1 | 1 | 3 |
| <b>Wild-type</b> | <b>9.5 Gy</b> | 1 | 2 | 2 | 2 | 3 | 3 | 3 |   |
| <b>APChi</b>     | <b>0 Gy</b>   | 0 | 0 | 0 | 0 | 1 | 1 | 1 | 1 |
| <b>APChi</b>     | <b>9.5 Gy</b> | 1 | 1 | 1 | 1 | 2 | 2 | 2 | 3 |

**S10 Fig. Expression of  $\alpha$ -SMC actin in the heart at 6 months after irradiation.** Immunohistochemistry was used to assess  $\alpha$ -SMC actin expression in the whole heart. Scale bar = 100  $\mu$ m. In addition to vascular smooth muscle cells (red arrows), spindle-shaped  $\alpha$ -SMC actin positive cells (green arrows) were identified throughout the myocardium. These cells are likely myofibroblasts. Each stained slide was scored on a scale from 0 (no  $\alpha$ -SMC actin positive myofibroblasts) to 4 (more than 100 SMC actin positive myofibroblasts);  $n=7-8$  mice per group. Individual scores are listed in the table.
