# Supplementary material for: Sex-dependent effects of genetic upregulation of activated protein C on delayed effects of acute radiation exposure in the mouse heart, small intestine, and skin
Source: PubMed Central journal article supplement (PMC8143413; doi:10.1371/journal.pone.0252142), 2021-05-24
Supplement: pone.0252142.s011.pdf [file pone.0252142.s011.pdf]

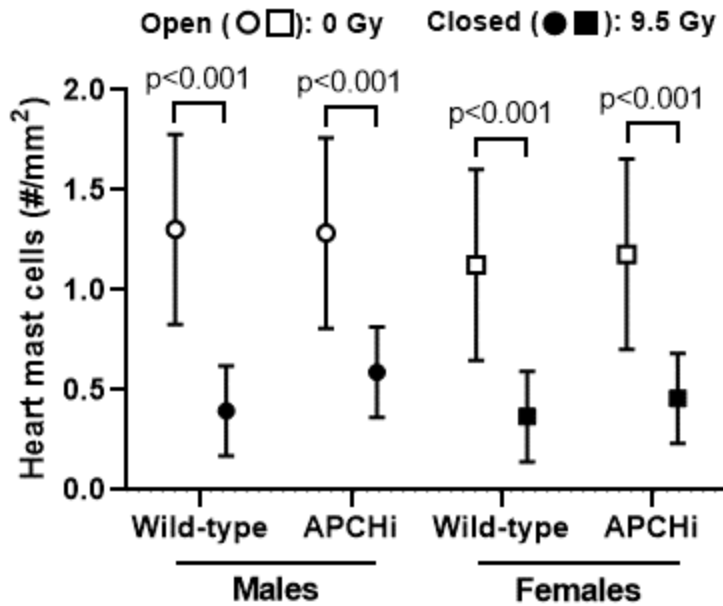

**S11 Fig. Mast cell numbers in the heart at 6 months after irradiation.** Toluidine Blue staining was used to visualize mast cells (scale bar = 100  $\mu\text{m}$ ), and mast cell numbers in both left and right ventricles were determined. Means and SD of the statistical model are shown.  $n=8-10$  animals per group. Brackets indicate significant differences between 0 Gy and 9.5 Gy.
