# Supplementary material for: Sex-dependent effects of genetic upregulation of activated protein C on delayed effects of acute radiation exposure in the mouse heart, small intestine, and skin
Source: PubMed Central journal article supplement (PMC8143413; doi:10.1371/journal.pone.0252142), 2021-05-24
Supplement: pone.0252142.s013.pdf [file pone.0252142.s013.pdf]

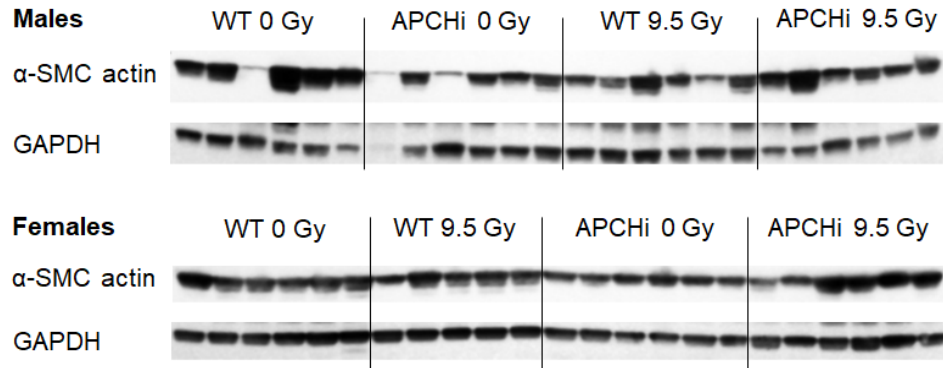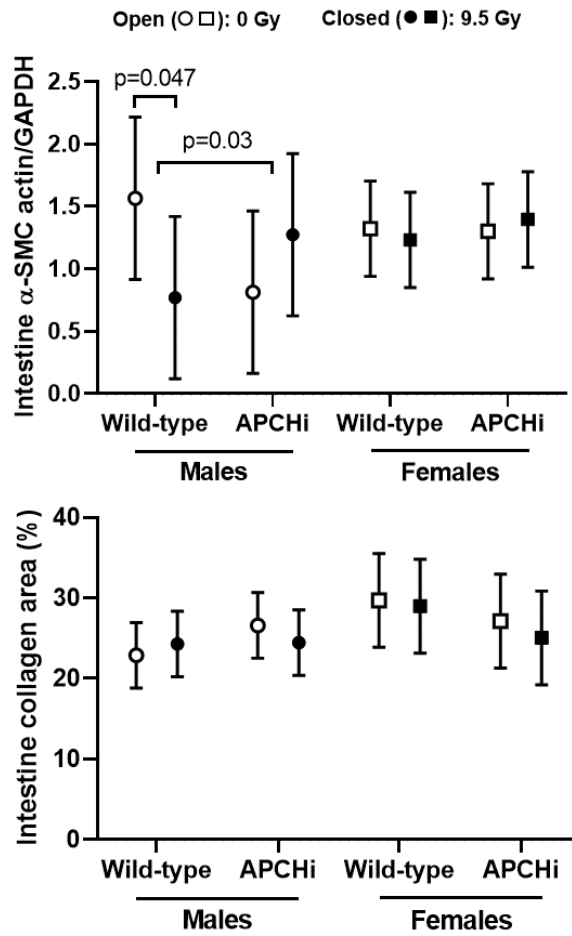

**S13 Fig. Expression of  $\alpha$ -SMC actin and collagen deposition in the small intestinal wall at 6 months after irradiation. A)** Immunoblotting to determine levels of  $\alpha$ -SMC actin corrected for the loading control GAPDH. Means and SD of the statistical model are shown;  $n=6$  mice per group. **B)** Collagen deposition as measured from Sirius Red histology. Means and SD of the statistical model are shown;  $n=8$  wild-type males in 0 Gy, 12 wild-type males in 9.5 Gy, 8 APChi males in 0 Gy, 10 APChi males in 9.5 Gy, 8 wild-type females in 0 Gy, 5 wild-type females in 9.5 Gy, 10 APChi females in 0 Gy, and 9 APChi females in 9.5 Gy. The short bracket indicates a significant difference between 0 Gy and 9.5 Gy. The wider bracket indicates that the effect of radiation in wild-type mice is significantly different from the effect of radiation in APChi mice.
