# Supplementary material for: Sex-dependent effects of genetic upregulation of activated protein C on delayed effects of acute radiation exposure in the mouse heart, small intestine, and skin
Source: PubMed Central journal article supplement (PMC8143413; doi:10.1371/journal.pone.0252142), 2021-05-24
Supplement: pone.0252142.s015.pdf [file pone.0252142.s015.pdf]

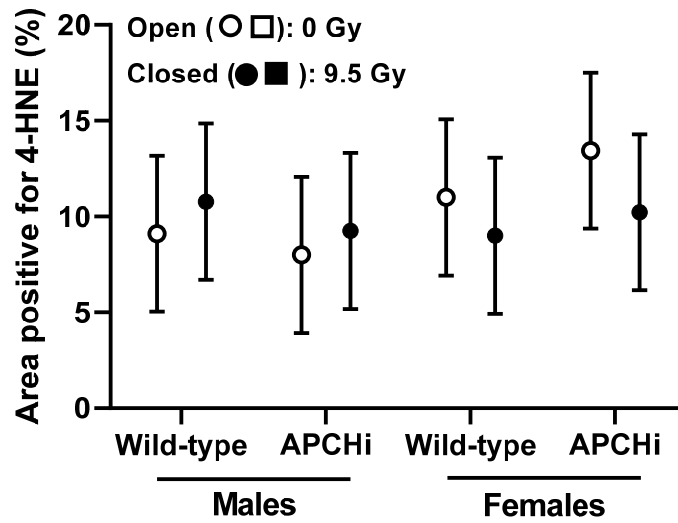

**S15 Fig. Epidermal are positive for 4-HNE.** Positivity for 4-HNE was assessed with immunohistochemistry. Graphs indicate means and SD of the statistical model;  $n=6-9$  wild-type males in 0 Gy, 10 wild-type males in 9.5 Gy, 6-8 APCHi males in 0 Gy, 8-9 APCHi males in 9.5 Gy, 7-8 wild-type females in 0 Gy, 5-6 wild-type females in 9.5 Gy, 8-9 APCHi females in 0 Gy, and 8-9 APCHi females in 9.5 Gy.
