# Supplementary material for: Sex-dependent effects of genetic upregulation of activated protein C on delayed effects of acute radiation exposure in the mouse heart, small intestine, and skin
Source: PubMed Central journal article supplement (PMC8143413; doi:10.1371/journal.pone.0252142), 2021-05-24
Supplement: pone.0252142.s016.pdf [file pone.0252142.s016.pdf]

|                 |                            | ♂            |       | ♀         |       |
|-----------------|----------------------------|--------------|-------|-----------|-------|
|                 |                            | Wild-type    | APChi | Wild-type | APChi |
| Heart           | Diameter (systole)         | ↑            | ↑     | ▬         | ▬     |
|                 | Inner diameter (systole)   | ↑            | ↑     | ▬         | ▬     |
|                 | Volume (systole)           | ↑            | ↑     | ▬         | ▬     |
|                 | Ejection Fraction          | ↓            | ↓     | ▬         | ▬     |
|                 | Fractional Shortening      | ↓            | ↓     | ▬         | ▬     |
|                 | Stroke Volume              | ▬            | ▬     | ▬         | ▬     |
|                 | LVPW thickness             | ↓            | ▬     | ▬         | ▬     |
|                 | Mitral valve E/A           | ▬            | ▬     | ↑         | ↑     |
|                 | Heart rate                 | Not measured |       | ▬         | ▬     |
|                 | Collagen deposition        | ↑            | ↑     | ▬         | ↑     |
|                 | α-SMC actin positive cells | ↑            | ↑     | ↑         | ↑     |
|                 | Mast cell number           | ↓            | ↓     | ↓         | ↓     |
|                 | TLR4 expression            | ↑            | ▬     | ↑         | ▬     |
|                 | CD45 positive cells        | ↑            | ▬     | ▬         | ↑     |
|                 | Microvascular density      | ↓            | ↓     | ↓         | ▬     |
|                 | vWf positive cells         | ↑            | ↑     | ↑         | ↑     |
| Small intestine | MPO positive cells         | ▬            | ▬     | ↑         | ↑     |
|                 | CD2 expression             | ↑            | ↑     | ▬         | ▬     |
|                 | Collagen deposition        | ▬            | ▬     | ▬         | ▬     |
|                 | α-SMC actin                | ▬            | ▬     | ▬         | ▬     |
|                 | Mast cell numbers          | ▬            | ▬     | ▬         | ▬     |
| Epidermis       | 4-HNE positive cells       | ▬            | ▬     | ▬         | ▬     |
|                 | Epidermal thickness        | ↑            | ▬     | ↑         | ▬     |
|                 | 3-NT positive cells        | ↑            | ▬     | ↑         | ▬     |

**S16 Fig. Graphic summary of research results obtained from male and female wild-type and APChi mice at 6 months after 9.5 Gy compared to time-matched sham-irradiated controls.** Arrow up: increase in irradiated animals compared to sham controls within the same genotype. Arrow down: decrease in irradiated animals compared to sham controls within the same genotype. Horizontal line: no significant effect of radiation. Shaded areas highlight differences in radiation response between the two genotypes.
