# Supplementary material for: Sex-dependent effects of genetic upregulation of activated protein C on delayed effects of acute radiation exposure in the mouse heart, small intestine, and skin
Source: PubMed Central journal article supplement (PMC8143413; doi:10.1371/journal.pone.0252142), 2021-05-24
Supplement: pone.0252142.s017.pdf [file pone.0252142.s017.pdf]

**S1 Table. Primary antibodies in immunohistochemistry and immunoblotting**

| <b>Protein target</b>                     | <b>Host</b> | <b>Manufacturer (and clone)</b>                   | <b>Dilution</b> |
|-------------------------------------------|-------------|---------------------------------------------------|-----------------|
| <i>Antibodies in immunohistochemistry</i> |             |                                                   |                 |
| 3-nitrotyrosine                           | Rabbit      | EMD Millipore, Burlington, MA                     | 1:1,000         |
| 4-hydroxynonenal                          | Rabbit      | Abcam, Cambridge, MA                              | 1:800           |
| $\alpha$ -smooth muscle cell (SMC) actin  | Rabbit      | Abcam                                             | 1:1,000         |
| CD45                                      | Rat         | Santa Cruz Biotechnology, Santa Cruz, CA (30-F11) | 1:200           |
| Von Willebrand factor                     | Rabbit      | Santa Cruz Biotechnology (H-300)                  | 1:25            |
| Myeloperoxidase                           | Rabbit      | Dako/Agilent, Troy, MA                            | 1:100           |
| <i>Antibodies in immunoblotting</i>       |             |                                                   |                 |
| $\alpha$ SMC actin                        | Rabbit      | Abcam                                             | 1:4,000         |
| CD2                                       | Rabbit      | M-180, Santa Cruz Biotechnology                   | 1:2,000         |
| CD45                                      | Rat         | 30-F11, Santa Cruz Biotechnology                  | 1:40,000        |
| GAPDH                                     | Mouse       | 6C5, Santa Cruz Biotechnology                     | 1:20,000        |
| Mast cell tryptase                        | Rabbit      | FL-275, Santa Cruz Biotechnology                  | 1:20,000        |
| Toll-like receptor 4/MD2 complex          | Mouse       | MTS510, Thermo Fisher Scientific, Waltham, MA     | 1:1,000         |
