# Supplementary material for: Sex-dependent effects of genetic upregulation of activated protein C on delayed effects of acute radiation exposure in the mouse heart, small intestine, and skin
Source: PubMed Central journal article supplement (PMC8143413; doi:10.1371/journal.pone.0252142), 2021-05-24
Supplement: pone.0252142.s018.pdf [file pone.0252142.s018.pdf]

**S2 Table. Power analyses: Effect sizes detectable with 0.80 power on a 0.05 significance level.** The table shows detectable effect sizes, based on two sample sizes ( $n = 6$  and  $n = 15$ ) in each of the radiation×genotype×sex groups.

| <i>n</i>      | Simple | Interaction |
|---------------|--------|-------------|
| 6 of one sex  | 1.66   | 2.36        |
| 15 of one sex | 1.04   | 1.46        |

The effect sizes are expressed in SD units, where SD is the root mean square error assumed constant among all groups. The targeted power was 0.80 on 0.05 significance level *t*-tests conducted within the ANOVA or ANCOVA context. The simple effect is the difference in means between sham and 9.5 Gy irradiation for a given genotype. The interaction effect is the difference in the simple effects between APCHi and wild-type mice.
